# Supplementary material for: Silver nanoparticles-containing dual-function hydrogels based on a guar gum-sodium borohydride system
Source: PubMed Central journal article supplement (PMC5098157; doi:10.1038/srep36497), 2016-11-07
Supplement: srep36497-s1.pdf [file srep36497-s1.pdf]

# Supplementary information

## Silver nanoparticles-containing dual-function hydrogels based on a guar gum-sodium borohydride system

Lei Dai,<sup>1</sup> Ben Nadeau,<sup>1</sup> Xingye An,<sup>1</sup> Dong Cheng,<sup>1</sup> Zhu Long,<sup>2</sup> & Yonghao Ni\*<sup>1</sup>

1. Department of Chemical Engineering, University of New Brunswick, Fredericton, NB E3B 5A3, Canada

2. Key Laboratory of Eco-textiles, Ministry of Education, Jiangnan University, Wuxi 214122, China

Correspondence and requests for materials should be addressed to Y. N. (e-mail: [yonghao@unb.ca](mailto:yonghao@unb.ca))

**Supplementary Figures**

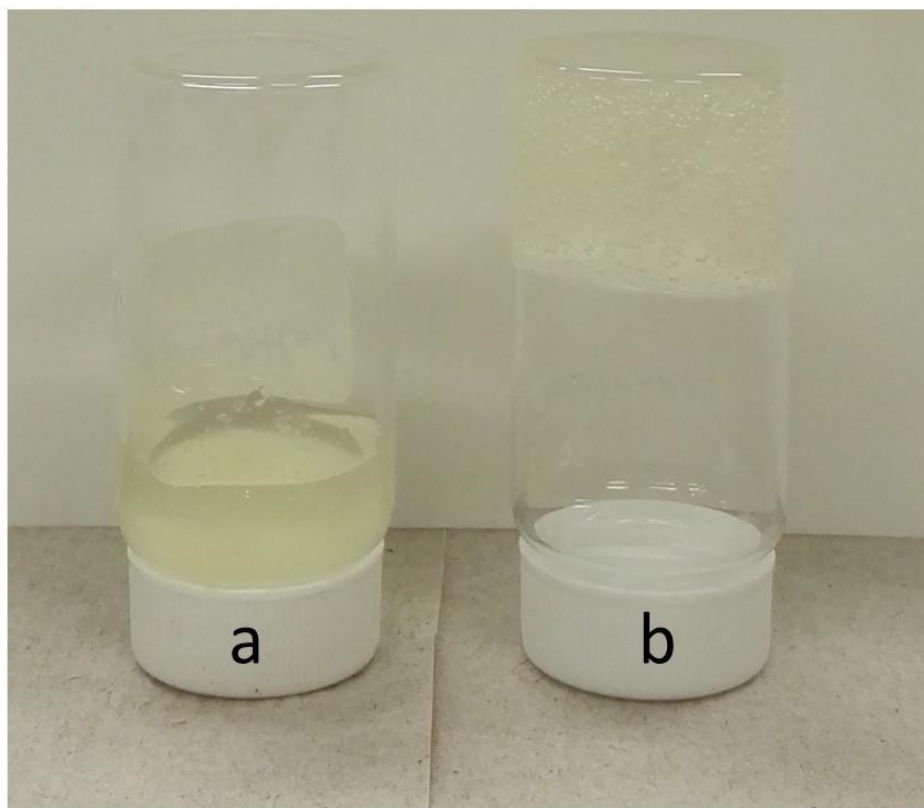

**Supplementary Figure S1.** Experimental in demonstrating the role of  $\text{NaBO}_2$  for the formation of GG hydrogels. **(a)** The GG solution ( $\text{pH} = 13.0 \pm 0.1$ ) was mixed with  $\text{NaBH}_4$  aq. ( $\text{pH} = 13.0 \pm 0.1$ ), under the conditions, no  $\text{NaBO}_2$  was formed, thus no gelation occurred. **(b)** the GG solution was mixed with fresh prepared  $\text{NaBH}_4$  aq. ( $\text{pH} = 9.6 \pm 0.1$ ), under the conditions,  $\text{NaBO}_2$  was formed due to hydrolysis, thus gelation occurred.

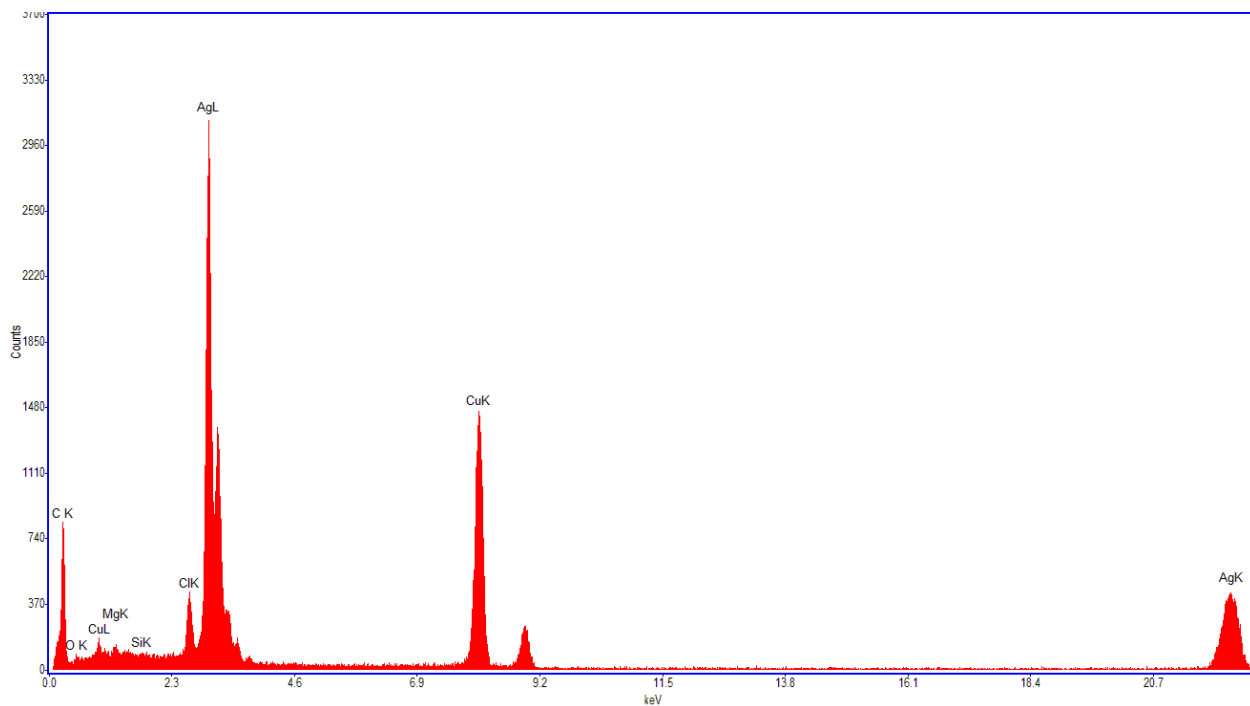

**Supplementary Figure S2.** EDX analysis of the AgNPs/GG hydrogels, providing the direct evidence for the generation of AgNPs.

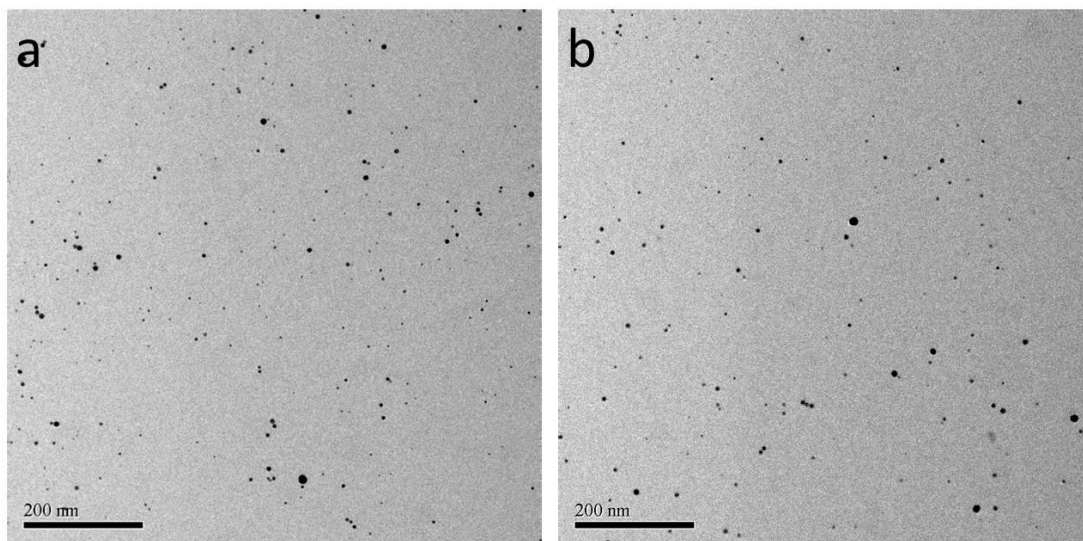

**Supplementary Figure S3.** TEM pictures of AgNPs in GG-based hydrogels. **(a)** Freshly prepared sample. **(b)** The sample stored for two weeks (it showed that the AgNPs were stable in the hydrogel).

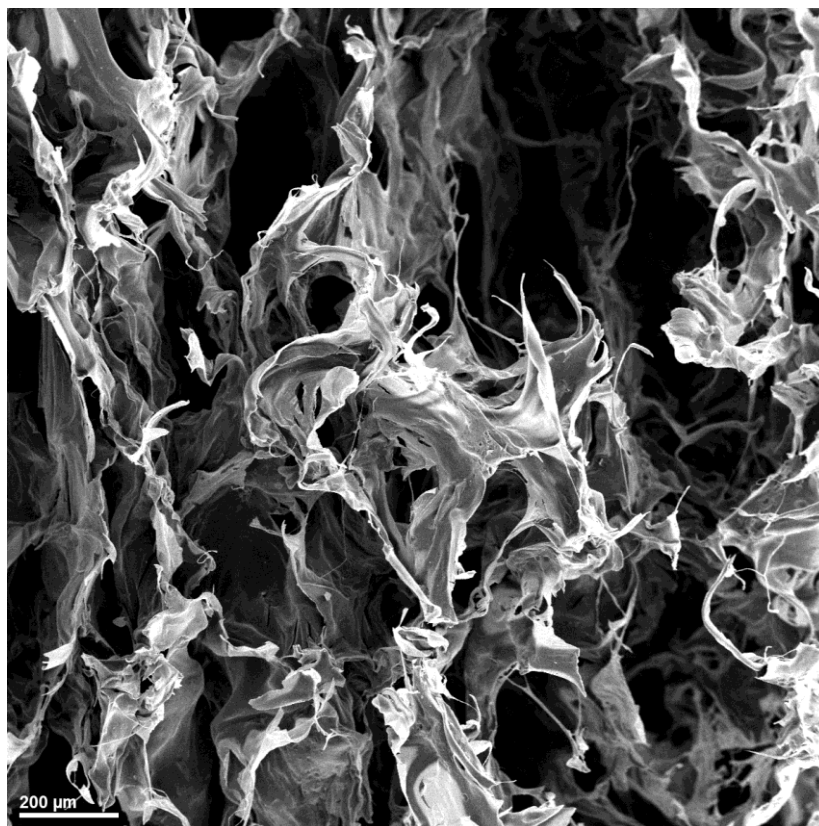

**Supplementary Figure S4.** SEM picture of cross-section of dried AgNPs/GG hydrogels, showing the porous structure of the hydrogels.

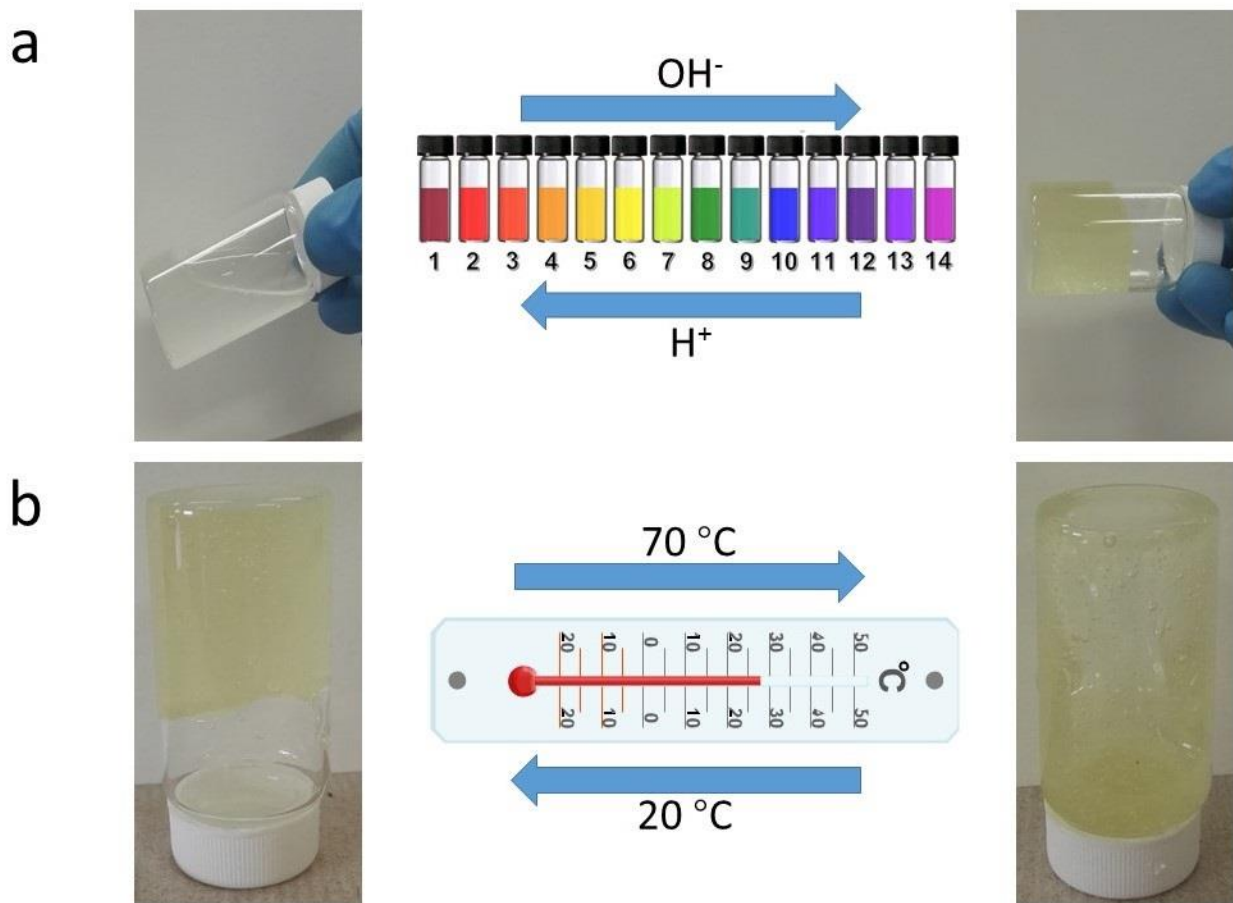

**Supplementary Figure S5.** Multi-stimuli responsive properties of GG-based hydrogels. **(a)** pH responsive performance of GG hydrogels (the sol-gel switch can be realized by pH changes). **(b)** Thermal responsive performance of GG hydrogels (the sol-gel switch can be realized by temperature changes).

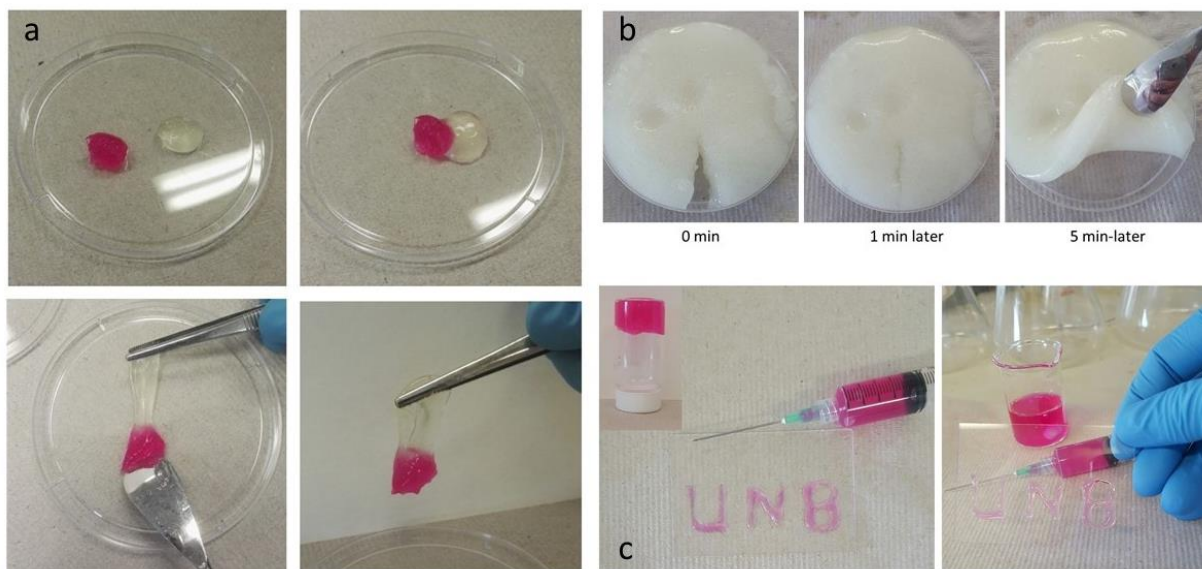

**Supplementary Figure S6.** Self-healing and injectable properties of GG-based hydrogels. **(a)** Two pieces of hydrogels (one of which was dyed to red to show the healing between the two) merged to a homogeneous one. **(b)** The hydrogel recovered from the cutting wound. **(c)** Hydrogels were injected by a syringe onto a glass slide (the hydrogels for injectable testing were prepared using 0.5% (w/v) GG solution).

Supplementary Video 1. Preparation of AgNPs/GG hydrogels using freshly prepared  $\text{NaBH}_4$

Supplementary Video 2. Preparation of GG hydrogels using freshly prepared  $\text{NaBH}_4$

Supplementary Video 3. Preparation of GG hydrogels using fully hydrolyzed  $\text{NaBH}_4$

Supplementary Video 4. Self-healing properties of GG hydrogels
